# Supplementary material for: A wearable, flexible sensor for real-time, home monitoring of sleep apnea
Source: PubMed Central journal article supplement (PMC9010767; doi:10.1016/j.isci.2022.104163), 2022-03-25
Supplement: mmc1.pdf [file mmc1.pdf]

**iScience, Volume 25**

**Supplemental information**

**A wearable, flexible sensor for real-time, home  
monitoring of sleep apnea**

**Satoko Honda, Hyuga Hara, Takayuki Arie, Seiji Akita, and Kuniharu Takei**

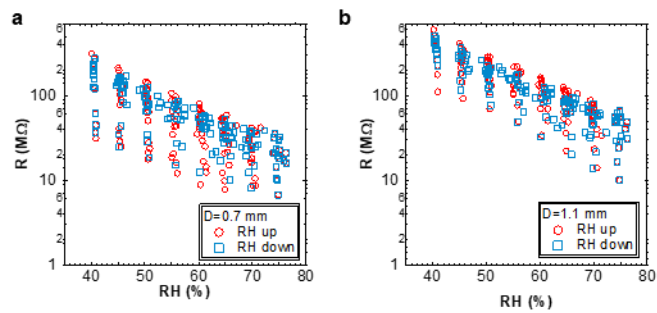

Figure S1. Fundamental characteristics of LIG humidity sensor at different device size, Related to Figure 2. ZIS humidity sensor resistance at (a)  $D=0.7$  mm and (b)  $D=1.1$  mm of LIG electrode distance under humidity change from RH40 to 75%.

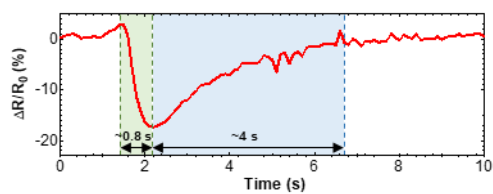

Figure S2. Response time of ZIS humidity sensor by applying breath over the sensor, Related to Figure 3.

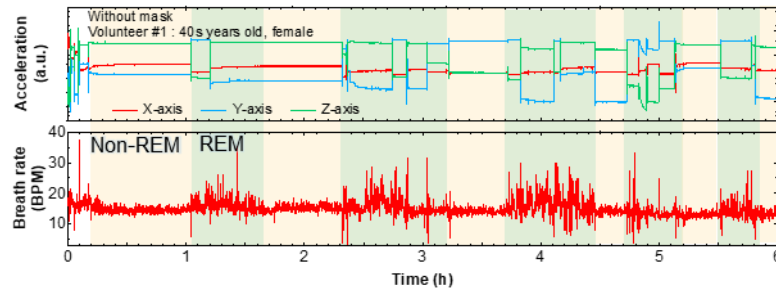

Figure S3. Long-time breath monitoring results during sleep, Related to Figure 5. Real-time monitoring results of (a) three-axis acceleration sensor outputs and (b) BPM calculated from humidity resistance peaks by attaching the sensor directly to volunteer #1's face during sleep.

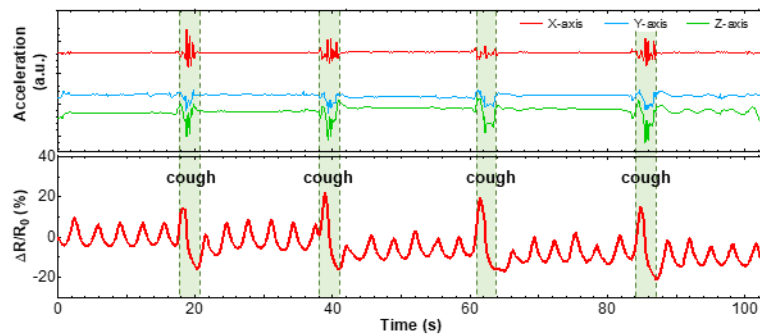

Figure S4. Real-time monitoring of acceleration sensor and humidity sensor with coughs, Related to Figure 5.

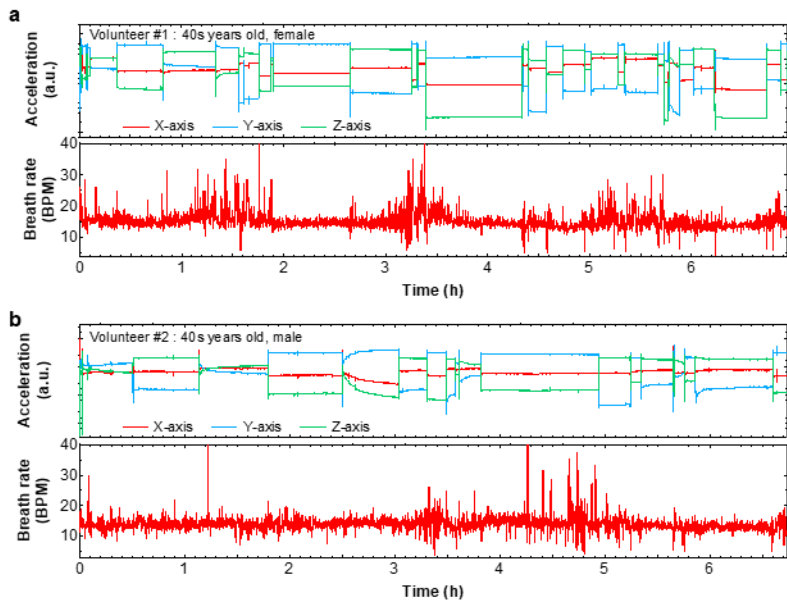

Figure S5. Real-time sleep apnea monitoring, Related to Figure 5. Real-time monitoring results of three-axis acceleration sensor output and BPM from (a) volunteer #1 and (b) volunteer #2.

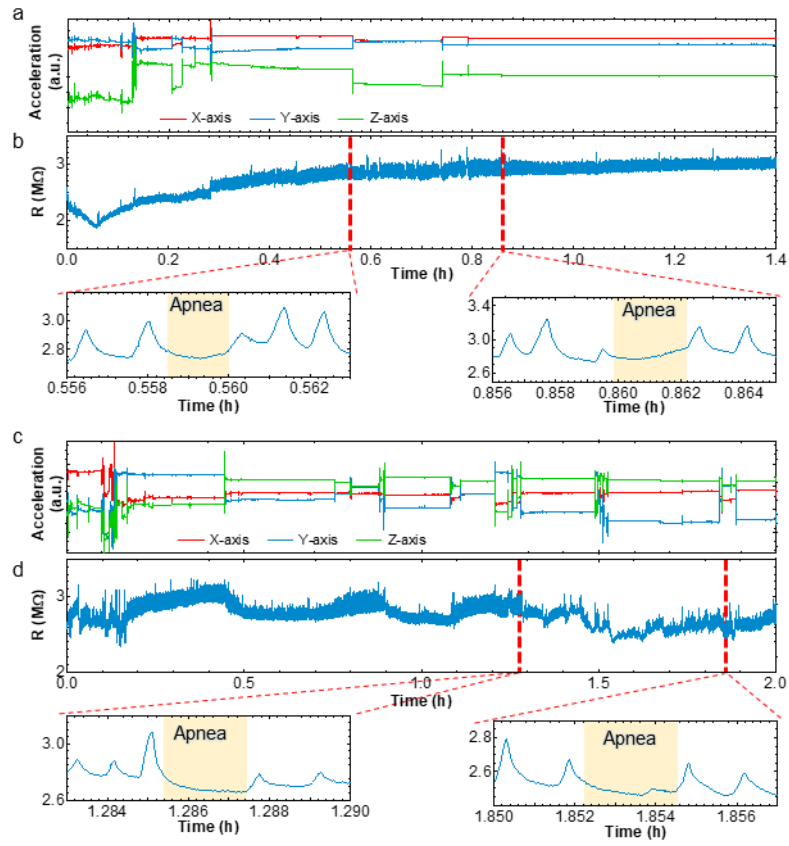

Figure S6. Real-time sleep apnea and specific apnea results, Related to Figure 5. Real-time monitoring results recorded from volunteer #3 of (a and c) three-axis acceleration sensor outputs and (b and d) humidity sensor resistance measured on different nights during sleep.
